# Supplementary material for: DFT study of the structure, chemical ordering and molecular adsorption of Pd–Ir nanoalloys
Source: Royal Society of Chemistry journal article supplement (doi:10.1039/c7cp04811d), 2017-01-01
Supplement: c7cp04811d1.pdf [file c7cp04811d1.pdf]

Supporting Information of:

**DFT study of the structure, chemical ordering and  
molecular adsorption of Pd-Ir nanoalloys**

Tian-E Fan,<sup>a,b</sup> Ilker Demiroglu,<sup>b</sup> Heider A. Hussein,<sup>b, c</sup> Tun-Dong Liu,<sup>a\*</sup> Roy L. Johnston<sup>b\*</sup>

<sup>a</sup>*Department of Automation, Xiamen University, Xiamen, 361005, China. E-mail: ltd@xmu.edu.cn*

<sup>b</sup>*School of Chemistry, University of Birmingham, Edgbaston, Birmingham B15 2TT, UK. E-mail:  
[r.l.johnston@bham.ac.uk](mailto:r.l.johnston@bham.ac.uk)*

<sup>c</sup>*Department of Chemistry, College of Science, University of Kufa, Najaf, Iraq*

Table 1. Detailed comparison of the lattice constant, cohesive energy, and bulk modulus for bulk Pd (fcc) and Ir (fcc) with experimental and theoretical data.

|                   |    | This method | Reference (PBE)     | Experiment          |
|-------------------|----|-------------|---------------------|---------------------|
| Lattice parameter | Pd | 3.940       | 3.95 <sup>[3]</sup> | 3.88 <sup>[1]</sup> |
| (Å)               | Ir | 3.872       | 3.89 <sup>[5]</sup> | 3.84 <sup>[6]</sup> |
| Cohesive energy   | Pd | 3.743       | 3.63 <sup>[3]</sup> | 3.89 <sup>[2]</sup> |
| (eV/atom)         | Ir | 7.351       | 8.96 <sup>[5]</sup> | 6.94 <sup>[2]</sup> |
| Bulk modulus      | Pd | 168.96      | 166 <sup>[4]</sup>  | 181 <sup>[2]</sup>  |
| (GPa)             | Ir | 345.78      | 340 <sup>[5]</sup>  | 355 <sup>[7]</sup>  |

[1] J. Heyd, G. E. Scuseria, *J. Chem. Phys.*, 2004, 121, 1187.

[2] C. Kittel, *Introduction to solid state physics* (Wiley, 2005).

[3] J. L. F. D. Silva, C. Stampfl, M. Scheffler, *Surf. Sci.*, 2006, 600, 703.

[4] M. Ropo, K. Kokko, L. Vitos, *Phys. Rev. B*, 2008, 77, 195445.

[5] I. A. Erikat, B. A. Hamad, J. M. Khalifeh, *Eur. Phys. J. B*, 2009, 67, 35.

[6] C. Kittel, *Introduction to Solid State Physics* (Wiley, New York, 1971).

[7] D.R. Lide, *CRC Handbook of chemistry and physics*, 80th edition (CRC Press, Boca Raton, 1999–2000).
